# Supplementary material for: Phospha- and arsa-bridged cyclononatetraenides: novel zwitterionic 10π aromatic hemispheres
Source: Royal Society of Chemistry journal article supplement (doi:10.1039/c9nj00235a), 2019-01-01
Supplement: c9nj00235a1.pdf [file c9nj00235a1.pdf]

## Supporting Information

### **Phospha- and Arsa-Bridged Cyclononatetraenides: Novel Zwitterionic $10\pi$ Aromatic Hemispheres**

Gabriela L. Borosky,<sup>\*a</sup> Kenneth K. Laali<sup>\*b</sup> and Mark Mascal<sup>c</sup>

<sup>a</sup>INFIQC, CONICET and Departamento de Química Teórica y Computacional, Facultad de Ciencias Químicas, Universidad Nacional de Córdoba, Ciudad Universitaria, Córdoba 5000, Argentina

<sup>b</sup>Department of Chemistry, University of North Florida, 1 UNF Drive, Jacksonville, Florida 32224, USA

<sup>c</sup>Department of Chemistry, University of California Davis, Davis, CA 95616, USA

#### **Contents**

- 1. Figure S1**
- 2. Figure S2**
- 3. Figure S3**
- 4. Figure S4**
- 5. Table S1**
- 6. Table S2**
- 7. Cartesian coordinates for the optimized structures.**

B3LYP/6-311++G(d,p)

 $^{13}\text{C}$  NMR $^1\text{H}$  NMR $^{31}\text{P}$  NMR $^{19}\text{F}$  NMR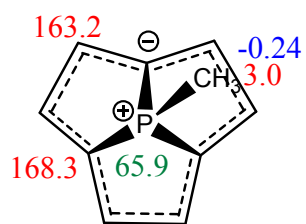

NICS(1) = -6.19  
NICS(1)<sub>zz</sub> = -15.24

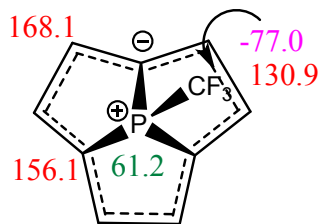

NICS(1) = -5.50  
NICS(1)<sub>zz</sub> = -15.34

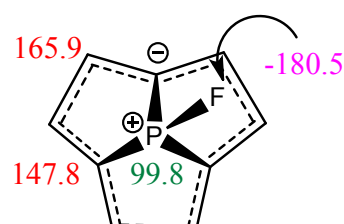

NICS(1) = -4.62  
NICS(1)<sub>zz</sub> = -14.55

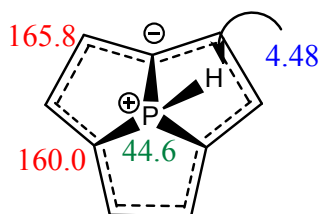

NICS(1) = -5.19  
NICS(1)<sub>zz</sub> = -13.25

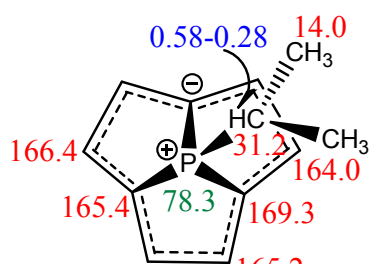

NICS(1) = -5.68  
NICS(1)<sub>zz</sub> = -15.45

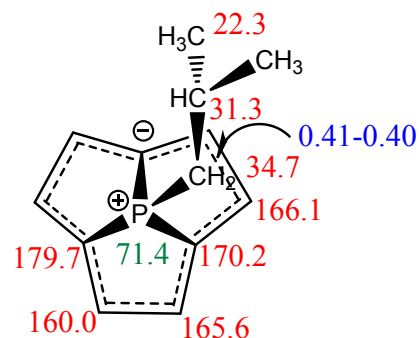

NICS(1) = -5.52  
NICS(1)<sub>zz</sub> = -12.82

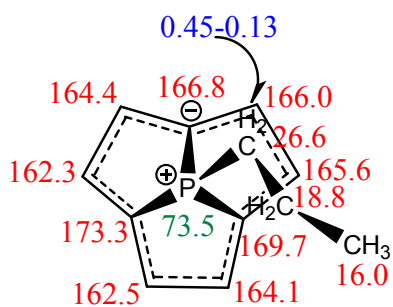

NICS(1) = -5.23  
NICS(1)<sub>zz</sub> = -12.40

same compound,  
different rotamers

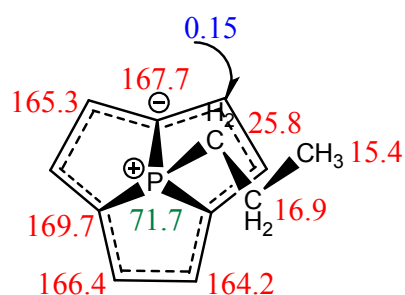

NICS(1) = -5.96  
NICS(1)<sub>zz</sub> = -14.52

**Figure S1.** GIAO NMR and NICS data for the phosphatriquinane-derived zwitterions with different R groups at phosphorus.

B3LYP/6-311++G(d,p)     $^{13}\text{C}$  NMR     $^1\text{H}$  NMR     $^{31}\text{P}$  NMR     $^{19}\text{F}$  NMR

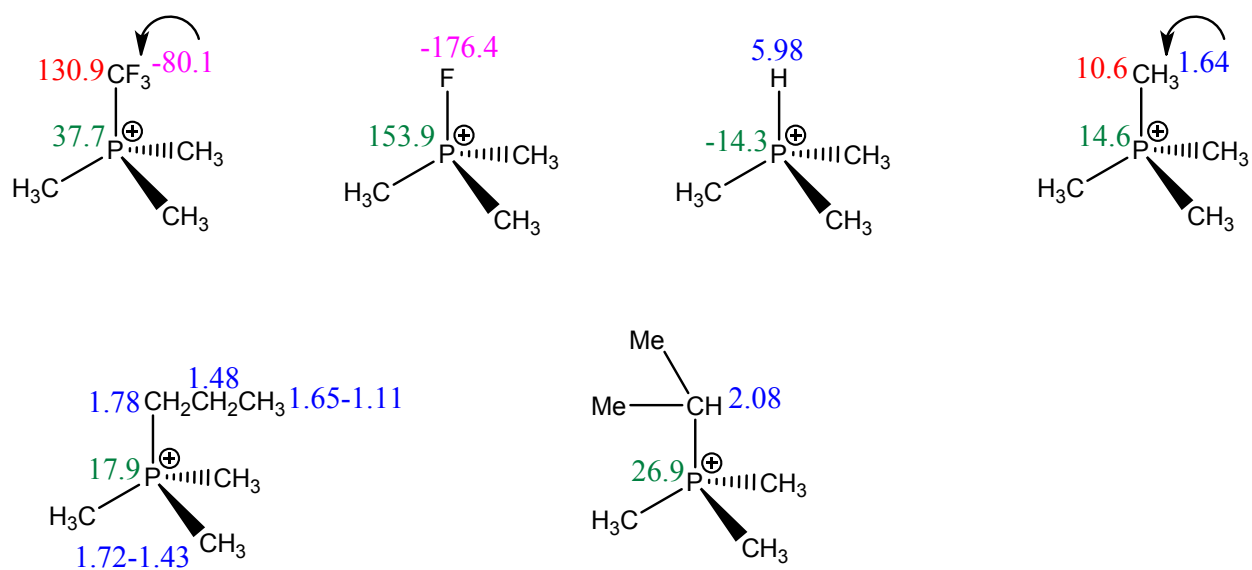

**Figure S2.** Multinuclear GIAO NMR data for model systems.

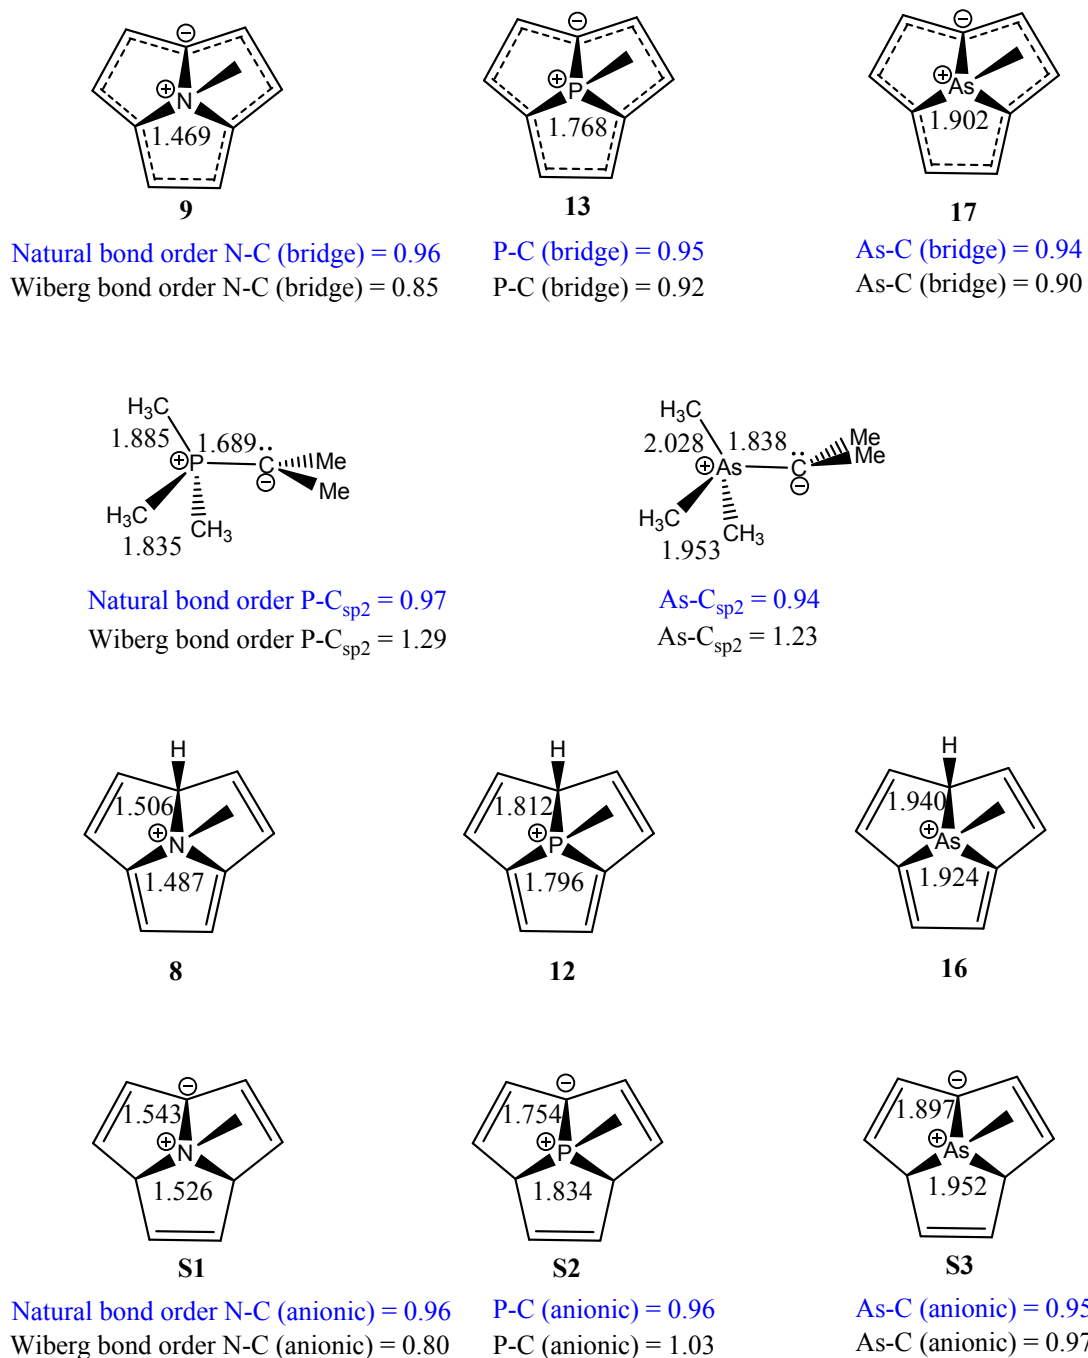

**Figure S3.** Selected bond-lengths and computed natural bond orders (NBO) and Wiberg bond orders in the zwitterions and comparison with simple ylides.

B3LYP/6-311++G(d,p)  $^1\text{H}$  NMR  $^{13}\text{C}$  NMR  $^{17}\text{O}$  NMR

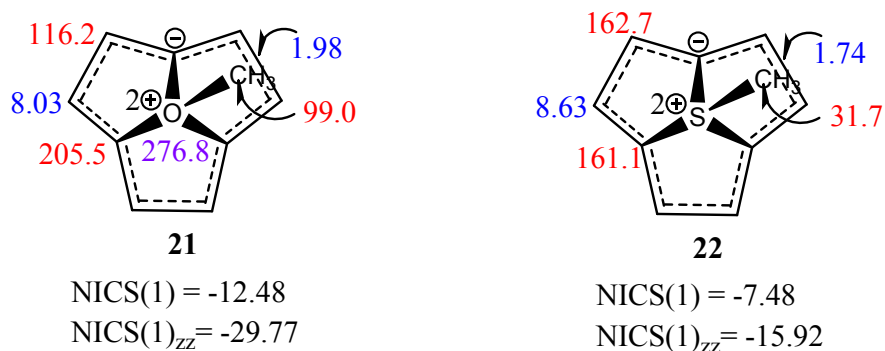

**Figure S4.** Multinuclear NMR and NICS data for the oxatriquinane and thiatriquinane derivatives.

**Table S1.** Solvation effect on NICS values for P-R structures in Figure 3 (ppm).

| R               | NICS(1)   |                   |                                 |                    | NICS(1) <sub>zz</sub> |                   |                                 |                    |
|-----------------|-----------|-------------------|---------------------------------|--------------------|-----------------------|-------------------|---------------------------------|--------------------|
|                 | Gas Phase | <i>n</i> -pentane | CH <sub>2</sub> Cl <sub>2</sub> | CH <sub>3</sub> CN | Gas Phase             | <i>n</i> -pentane | CH <sub>2</sub> Cl <sub>2</sub> | CH <sub>3</sub> CN |
| CH <sub>3</sub> | -6.19     | -5.96             | -5.84                           | -5.91              | -15.24                | -15.10            | -14.88                          | -14.93             |
| CF <sub>3</sub> | -5.50     | -5.47             | -5.35                           | -5.33              | -15.34                | -15.26            | -14.97                          | -14.86             |
| F               | -4.62     | -4.55             | -4.43                           | -4.39              | -14.55                | -14.38            | -14.07                          | -13.97             |
| H               | -5.19     | -5.15             | -5.08                           | -5.06              | -13.25                | -13.12            | -12.87                          | -12.81             |
| <i>iso</i> -Pr  | -5.68     | -5.53             | -5.47                           | -5.45              | -15.45                | -15.97            | -15.79                          | -15.75             |
| <i>sec</i> -Bu  | -5.52     | -5.46             | -5.39                           | -5.38              | -12.82                | -12.55            | -12.70                          | -12.52             |
| <i>n</i> -Pr    | -5.96     | -5.87             | -5.77                           | -5.76              | -14.52                | -14.38            | -14.18                          | -14.14             |

**Table S2.** Solvation effect on selected chemical shifts for P-R structures shown in Figure 3 (ppm).

| R               | Chemical shift |                   |                                 |                    |
|-----------------|----------------|-------------------|---------------------------------|--------------------|
|                 | Gas Phase      | <i>n</i> -pentane | CH <sub>2</sub> Cl <sub>2</sub> | CH <sub>3</sub> CN |
| CH <sub>3</sub> | -0.24          | -0.16             | -0.04                           | -0.06              |
| CF <sub>3</sub> | -77.0          | -77.6             | -78.07                          | -78.2              |
| F               | -180.5         | -181.1            | -181.8                          | -181.9             |
| H               | 4.48           | 4.59              | 4.76                            | 4.81               |
| <i>iso</i> -Pr  | 0.28           | 0.35              | 0.35                            | 0.34               |
| <i>sec</i> -Bu  | 0.40           | 0.43              | 0.44                            | 0.41               |
| <i>n</i> -Pr    | 0.15           | 0.23              | 0.35                            | 0.38               |

**Optimized cartesian coordinates for compound 6.**

| Center Number | Atomic Number | Atomic Type | Coordinates (Angstroms) |           |           |
|---------------|---------------|-------------|-------------------------|-----------|-----------|
|               |               |             | X                       | Y         | Z         |
| 1             | 6             | 0           | -1.945559               | 0.356467  | -0.667483 |
| 2             | 6             | 0           | -1.281477               | 1.508191  | -0.665497 |
| 3             | 6             | 0           | 0.000000                | 1.398365  | 0.133799  |
| 4             | 7             | 0           | -0.000000               | -0.000181 | 0.646486  |
| 5             | 6             | 0           | -1.210655               | -0.698903 | 0.131896  |
| 6             | 1             | 0           | -2.892413               | 0.167402  | -1.159193 |
| 7             | 1             | 0           | -1.591404               | 2.423653  | -1.155312 |
| 8             | 1             | 0           | 0.000000                | 2.124814  | 0.959897  |
| 9             | 1             | 0           | -1.841348               | -1.061824 | 0.957049  |
| 10            | 6             | 0           | 1.281477                | 1.508191  | -0.665497 |
| 11            | 1             | 0           | 1.591404                | 2.423653  | -1.155312 |
| 12            | 6             | 0           | -0.664759               | -1.865010 | -0.665234 |
| 13            | 1             | 0           | -1.302438               | -2.591475 | -1.154795 |
| 14            | 6             | 0           | 0.664759                | -1.865010 | -0.665234 |
| 15            | 1             | 0           | 1.302438                | -2.591475 | -1.154795 |
| 16            | 6             | 0           | 1.945559                | 0.356467  | -0.667483 |
| 17            | 1             | 0           | 2.892413                | 0.167402  | -1.159193 |

|    |   |   |          |           |          |
|----|---|---|----------|-----------|----------|
| 18 | 6 | 0 | 1.210655 | -0.698903 | 0.131896 |
| 19 | 1 | 0 | 1.841348 | -1.061824 | 0.957049 |

---

### Optimized cartesian coordinates for compound 7.

| Center Number | Atomic Number | Atomic Type | Coordinates (Angstroms) |           |           |
|---------------|---------------|-------------|-------------------------|-----------|-----------|
|               |               |             | X                       | Y         | Z         |
| 1             | 6             | 0           | -1.941296               | 0.356472  | -0.665734 |
| 2             | 6             | 0           | -1.279001               | 1.506198  | -0.663009 |
| 3             | 6             | 0           | -0.000000               | 1.439300  | 0.126805  |
| 4             | 7             | 0           | -0.000000               | 0.000754  | 0.700552  |
| 5             | 6             | 0           | -1.245231               | -0.717935 | 0.124779  |
| 6             | 1             | 0           | -2.877774               | 0.162192  | -1.171888 |
| 7             | 1             | 0           | -1.579513               | 2.415286  | -1.167166 |
| 8             | 1             | 0           | -0.000000               | 2.143229  | 0.965269  |
| 9             | 1             | 0           | -1.856782               | -1.068135 | 0.962824  |
| 10            | 6             | 0           | 1.279001                | 1.506198  | -0.663009 |
| 11            | 1             | 0           | 1.579513                | 2.415286  | -1.167166 |
| 12            | 6             | 0           | -0.663489               | -1.861799 | -0.661052 |
| 13            | 1             | 0           | -1.300414               | -2.578281 | -1.162960 |
| 14            | 6             | 0           | 0.663489                | -1.861799 | -0.661052 |
| 15            | 1             | 0           | 1.300414                | -2.578281 | -1.162960 |
| 16            | 6             | 0           | 1.941296                | 0.356472  | -0.665734 |
| 17            | 1             | 0           | 2.877774                | 0.162192  | -1.171888 |
| 18            | 6             | 0           | 1.245231                | -0.717935 | 0.124779  |
| 19            | 1             | 0           | 1.856782                | -1.068135 | 0.962824  |
| 20            | 6             | 0           | 0.000000                | -0.002060 | 2.196296  |
| 21            | 1             | 0           | 0.892754                | 0.512372  | 2.551095  |
| 22            | 1             | 0           | -0.892754               | 0.512372  | 2.551095  |
| 23            | 1             | 0           | 0.000000                | -1.033964 | 2.546627  |

---

### Optimized cartesian coordinates for compound 8.

| Center Number | Atomic Number | Atomic Type | Coordinates (Angstroms) |           |           |
|---------------|---------------|-------------|-------------------------|-----------|-----------|
|               |               |             | X                       | Y         | Z         |
| 1             | 6             | 0           | -2.054335               | 0.385428  | -0.573453 |
| 2             | 6             | 0           | -1.379496               | 1.558015  | -0.638761 |
| 3             | 6             | 0           | -0.000000               | 1.470445  | -0.005517 |
| 4             | 7             | 0           | -0.000000               | 0.037533  | 0.459844  |
| 5             | 6             | 0           | -1.172134               | -0.667387 | -0.124598 |
| 6             | 1             | 0           | -3.060890               | 0.226047  | -0.933839 |
| 7             | 1             | 0           | -1.787950               | 2.492084  | -1.000583 |
| 8             | 1             | 0           | -0.000000               | 2.137911  | 0.867645  |
| 9             | 6             | 0           | 1.379496                | 1.558015  | -0.638761 |

|    |   |   |           |           |           |
|----|---|---|-----------|-----------|-----------|
| 10 | 1 | 0 | 1.787950  | 2.492084  | -1.000582 |
| 11 | 6 | 0 | -0.735880 | -1.902095 | -0.475261 |
| 12 | 1 | 0 | -1.336056 | -2.685097 | -0.915168 |
| 13 | 6 | 0 | 0.735880  | -1.902095 | -0.475261 |
| 14 | 1 | 0 | 1.336056  | -2.685097 | -0.915168 |
| 15 | 6 | 0 | 2.054335  | 0.385428  | -0.573453 |
| 16 | 1 | 0 | 3.060890  | 0.226047  | -0.933839 |
| 17 | 6 | 0 | 1.172134  | -0.667387 | -0.124598 |
| 18 | 6 | 0 | 0.000000  | -0.063508 | 1.972704  |
| 19 | 1 | 0 | 0.896746  | 0.431282  | 2.342926  |
| 20 | 1 | 0 | -0.896746 | 0.431282  | 2.342926  |
| 21 | 1 | 0 | 0.000000  | -1.116213 | 2.245010  |

-----

**Optimized cartesian coordinates for compound 9.**

| Center<br>Number | Atomic<br>Number | Atomic<br>Type | Coordinates (Angstroms) |           |           |
|------------------|------------------|----------------|-------------------------|-----------|-----------|
|                  |                  |                | X                       | Y         | Z         |
| 1                | 6                | 0              | -2.067858               | 0.369766  | -0.403471 |
| 2                | 6                | 0              | -1.354051               | 1.606080  | -0.403844 |
| 3                | 6                | 0              | 0.000000                | 1.386656  | -0.105754 |
| 4                | 7                | 0              | -0.000000               | 0.000115  | 0.379284  |
| 5                | 6                | 0              | -1.200738               | -0.693118 | -0.105765 |
| 6                | 1                | 0              | -3.100262               | 0.270926  | -0.706405 |
| 7                | 1                | 0              | -1.784713               | 2.549446  | -0.707151 |
| 8                | 6                | 0              | 1.354051                | 1.606080  | -0.403844 |
| 9                | 1                | 0              | 1.784713                | 2.549446  | -0.707151 |
| 10               | 6                | 0              | -0.713819               | -1.975529 | -0.403648 |
| 11               | 1                | 0              | -1.315622               | -2.820294 | -0.706347 |
| 12               | 6                | 0              | 0.713819                | -1.975529 | -0.403648 |
| 13               | 1                | 0              | 1.315622                | -2.820294 | -0.706347 |
| 14               | 6                | 0              | 2.067858                | 0.369766  | -0.403471 |
| 15               | 1                | 0              | 3.100262                | 0.270926  | -0.706405 |
| 16               | 6                | 0              | 1.200738                | -0.693118 | -0.105765 |
| 17               | 6                | 0              | -0.000000               | -0.000185 | 1.892958  |
| 18               | 1                | 0              | 0.898327                | 0.518334  | 2.223143  |
| 19               | 1                | 0              | -0.000000               | -1.037809 | 2.221823  |
| 20               | 1                | 0              | -0.898327               | 0.518334  | 2.223143  |

-----

**Optimized cartesian coordinates for compound 10.**

| Center<br>Number | Atomic<br>Number | Atomic<br>Type | Coordinates (Angstroms) |           |           |
|------------------|------------------|----------------|-------------------------|-----------|-----------|
|                  |                  |                | X                       | Y         | Z         |
| 1                | 6                | 0              | -0.354672               | -1.927265 | -0.857446 |
| 2                | 6                | 0              | -1.510003               | -1.261576 | -0.841218 |



|    |    |   |           |           |           |
|----|----|---|-----------|-----------|-----------|
| 3  | 6  | 0 | -1.579845 | 0.000000  | -0.000542 |
| 4  | 15 | 0 | 0.012309  | 0.000000  | 1.035408  |
| 5  | 6  | 0 | 0.788222  | -1.366870 | -0.031655 |
| 6  | 1  | 0 | -0.201152 | -2.814120 | -1.466489 |
| 7  | 1  | 0 | -2.366948 | -1.566015 | -1.436214 |
| 8  | 1  | 0 | -2.469880 | 0.000000  | 0.636339  |
| 9  | 1  | 0 | 1.243911  | -2.145379 | 0.588085  |
| 10 | 6  | 0 | -1.510003 | 1.261576  | -0.841218 |
| 11 | 1  | 0 | -2.366948 | 1.566015  | -1.436215 |
| 12 | 6  | 0 | 1.832344  | -0.666765 | -0.881353 |
| 13 | 1  | 0 | 2.514734  | -1.250066 | -1.493845 |
| 14 | 6  | 0 | 1.832344  | 0.666765  | -0.881353 |
| 15 | 1  | 0 | 2.514734  | 1.250066  | -1.493845 |
| 16 | 6  | 0 | -0.354672 | 1.927265  | -0.857446 |
| 17 | 1  | 0 | -0.201152 | 2.814120  | -1.466489 |
| 18 | 6  | 0 | 0.788222  | 1.366870  | -0.031655 |
| 19 | 1  | 0 | 1.243911  | 2.145379  | 0.588085  |

---

#### Optimized cartesian coordinates for compound 11.

| Center<br>Number | Atomic<br>Number | Atomic<br>Type | Coordinates (Angstroms) |           |           |
|------------------|------------------|----------------|-------------------------|-----------|-----------|
|                  |                  |                | X                       | Y         | Z         |
| 1                | 6                | 0              | -1.942658               | 0.352896  | -0.762492 |
| 2                | 6                | 0              | -1.276941               | 1.509837  | -0.759533 |
| 3                | 6                | 0              | -0.000000               | 1.609334  | 0.070572  |
| 4                | 15               | 0              | 0.000000                | 0.001279  | 0.961686  |
| 5                | 6                | 0              | -1.391460               | -0.802665 | 0.068005  |
| 6                | 1                | 0              | -2.832458               | 0.189492  | -1.359818 |
| 7                | 1                | 0              | -1.581149               | 2.363569  | -1.354412 |
| 8                | 1                | 0              | 0.000000                | 2.482322  | 0.728817  |
| 9                | 1                | 0              | -2.149147               | -1.237395 | 0.725586  |
| 10               | 6                | 0              | 1.276941                | 1.509837  | -0.759533 |
| 11               | 1                | 0              | 1.581149                | 2.363569  | -1.354412 |
| 12               | 6                | 0              | -0.667404               | -1.862274 | -0.757412 |
| 13               | 1                | 0              | -1.254490               | -2.554651 | -1.350039 |
| 14               | 6                | 0              | 0.667404                | -1.862274 | -0.757412 |
| 15               | 1                | 0              | 1.254490                | -2.554651 | -1.350039 |
| 16               | 6                | 0              | 1.942658                | 0.352896  | -0.762492 |
| 17               | 1                | 0              | 2.832458                | 0.189492  | -1.359818 |
| 18               | 6                | 0              | 1.391460                | -0.802665 | 0.068005  |
| 19               | 1                | 0              | 2.149147                | -1.237395 | 0.725586  |
| 20               | 6                | 0              | 0.000000                | -0.002026 | 2.770377  |
| 21               | 1                | 0              | 0.892029                | 0.512092  | 3.133707  |
| 22               | 1                | 0              | -0.892029               | 0.512092  | 3.133707  |
| 23               | 1                | 0              | -0.000000               | -1.032712 | 3.130693  |

---

**Optimized cartesian coordinates for compound 12.**

| Center Number | Atomic Number | Atomic Type | Coordinates (Angstroms) |           |           |
|---------------|---------------|-------------|-------------------------|-----------|-----------|
|               |               |             | X                       | Y         | Z         |
| 1             | 6             | 0           | -0.343899               | -2.076419 | -0.765534 |
| 2             | 6             | 0           | -1.509288               | -1.379941 | -0.822472 |
| 3             | 6             | 0           | -1.613657               | 0.000000  | -0.116878 |
| 4             | 15            | 0           | -0.023907               | 0.000000  | 0.752447  |
| 5             | 6             | 0           | 0.771606                | -1.307039 | -0.188410 |
| 6             | 1             | 0           | -0.225151               | -3.038231 | -1.250810 |
| 7             | 1             | 0           | -2.388239               | -1.782546 | -1.313835 |
| 8             | 1             | 0           | -2.499583               | 0.000000  | 0.524707  |
| 9             | 6             | 0           | -1.509288               | 1.379941  | -0.822472 |
| 10            | 1             | 0           | -2.388239               | 1.782546  | -1.313835 |
| 11            | 6             | 0           | 1.886519                | -0.746678 | -0.740907 |
| 12            | 1             | 0           | 2.524910                | -1.256033 | -1.455670 |
| 13            | 6             | 0           | 1.886519                | 0.746678  | -0.740907 |
| 14            | 1             | 0           | 2.524910                | 1.256033  | -1.455670 |
| 15            | 6             | 0           | -0.343899               | 2.076419  | -0.765534 |
| 16            | 1             | 0           | -0.225151               | 3.038231  | -1.250810 |
| 17            | 6             | 0           | 0.771606                | 1.307039  | -0.188410 |
| 18            | 6             | 0           | 0.045967                | 0.000000  | 2.557855  |
| 19            | 1             | 0           | -0.454118               | 0.893932  | 2.935735  |
| 20            | 1             | 0           | -0.454118               | -0.893932 | 2.935735  |
| 21            | 1             | 0           | 1.091574                | 0.000000  | 2.871473  |

**Optimized cartesian coordinates for compound 13.**

| Center Number | Atomic Number | Atomic Type | Coordinates (Angstroms) |           |           |
|---------------|---------------|-------------|-------------------------|-----------|-----------|
|               |               |             | X                       | Y         | Z         |
| 1             | 6             | 0           | -2.060522               | 0.358515  | -0.562322 |
| 2             | 6             | 0           | -1.340660               | 1.605760  | -0.561880 |
| 3             | 6             | 0           | -0.000000               | 1.551917  | -0.078134 |
| 4             | 15            | 0           | 0.000000                | 0.000056  | 0.769726  |
| 5             | 6             | 0           | -1.343660               | -0.775625 | -0.078597 |
| 6             | 1             | 0           | -3.002990               | 0.297300  | -1.098969 |
| 7             | 1             | 0           | -1.759051               | 2.452791  | -1.098027 |
| 8             | 6             | 0           | 1.340660                | 1.605760  | -0.561880 |
| 9             | 1             | 0           | 1.759051                | 2.452791  | -1.098027 |
| 10            | 6             | 0           | -0.719980               | -1.963881 | -0.562021 |
| 11            | 1             | 0           | -1.244421               | -2.750123 | -1.097520 |
| 12            | 6             | 0           | 0.719980                | -1.963881 | -0.562021 |
| 13            | 1             | 0           | 1.244421                | -2.750123 | -1.097520 |
| 14            | 6             | 0           | 2.060522                | 0.358515  | -0.562322 |
| 15            | 1             | 0           | 3.002990                | 0.297300  | -1.098969 |
| 16            | 6             | 0           | 1.343660                | -0.775625 | -0.078597 |

|    |   |   |           |           |          |
|----|---|---|-----------|-----------|----------|
| 17 | 6 | 0 | 0.000000  | -0.000301 | 2.581202 |
| 18 | 1 | 0 | 0.893531  | 0.515469  | 2.935815 |
| 19 | 1 | 0 | 0.000000  | -1.032086 | 2.935579 |
| 20 | 1 | 0 | -0.893531 | 0.515469  | 2.935815 |

---

#### Optimized cartesian coordinates for compound 14.

---

| Center<br>Number | Atomic<br>Number | Atomic<br>Type | Coordinates (Angstroms) |           |           |
|------------------|------------------|----------------|-------------------------|-----------|-----------|
|                  |                  |                | X                       | Y         | Z         |
| 1                | 6                | 0              | -0.341247               | -1.925278 | -0.561128 |
| 2                | 6                | 0              | -1.497272               | -1.258545 | -0.560856 |
| 3                | 6                | 0              | -1.624419               | 0.000025  | 0.275223  |
| 4                | 33               | 0              | -0.000154               | -0.000004 | 1.472814  |
| 5                | 6                | 0              | 0.811668                | -1.405983 | 0.275249  |
| 6                | 1                | 0              | -0.191119               | -2.801348 | -1.188082 |
| 7                | 1                | 0              | -2.330982               | -1.566988 | -1.187686 |
| 8                | 1                | 0              | -2.549754               | 0.000035  | 0.857678  |
| 9                | 1                | 0              | 1.274162                | -2.207412 | 0.857761  |
| 10               | 6                | 0              | -1.497241               | 1.258598  | -0.560847 |
| 11               | 1                | 0              | -2.330944               | 1.567063  | -1.187677 |
| 12               | 6                | 0              | 1.838775                | -0.667320 | -0.560344 |
| 13               | 1                | 0              | 2.523192                | -1.235365 | -1.186468 |
| 14               | 6                | 0              | 1.838791                | 0.667267  | -0.560346 |
| 15               | 1                | 0              | 2.523224                | 1.235293  | -1.186470 |
| 16               | 6                | 0              | -0.341191               | 1.925284  | -0.561133 |
| 17               | 1                | 0              | -0.191036               | 2.801346  | -1.188091 |
| 18               | 6                | 0              | 0.811704                | 1.405958  | 0.275248  |
| 19               | 1                | 0              | 1.274220                | 2.207374  | 0.857761  |

---

#### Optimized cartesian coordinates for compound 15.

---

| Center<br>Number | Atomic<br>Number | Atomic<br>Type | Coordinates (Angstroms) |           |           |
|------------------|------------------|----------------|-------------------------|-----------|-----------|
|                  |                  |                | X                       | Y         | Z         |
| 1                | 6                | 0              | -0.359900               | -1.938057 | -0.890848 |
| 2                | 6                | 0              | -1.516904               | -1.271243 | -0.874591 |
| 3                | 6                | 0              | -1.661135               | 0.000000  | -0.046727 |
| 4                | 33               | 0              | 0.011900                | 0.000000  | 0.971745  |
| 5                | 6                | 0              | 0.828691                | -1.437221 | -0.079954 |
| 6                | 1                | 0              | -0.217298               | -2.816954 | -1.510749 |
| 7                | 1                | 0              | -2.361739               | -1.580732 | -1.480856 |
| 8                | 1                | 0              | -2.562461               | 0.000000  | 0.568566  |
| 9                | 1                | 0              | 1.290006                | -2.225129 | 0.517920  |
| 10               | 6                | 0              | -1.516904               | 1.271243  | -0.874591 |
| 11               | 1                | 0              | -2.361739               | 1.580732  | -1.480857 |

|    |   |   |           |           |           |
|----|---|---|-----------|-----------|-----------|
| 12 | 6 | 0 | 1.843253  | -0.667759 | -0.916271 |
| 13 | 1 | 0 | 2.523802  | -1.237658 | -1.540082 |
| 14 | 6 | 0 | 1.843253  | 0.667759  | -0.916271 |
| 15 | 1 | 0 | 2.523802  | 1.237658  | -1.540082 |
| 16 | 6 | 0 | -0.359900 | 1.938057  | -0.890848 |
| 17 | 1 | 0 | -0.217298 | 2.816954  | -1.510749 |
| 18 | 6 | 0 | 0.828691  | 1.437221  | -0.079954 |
| 19 | 1 | 0 | 1.290006  | 2.225129  | 0.517919  |
| 20 | 6 | 0 | 0.038460  | 0.000000  | 2.907840  |
| 21 | 1 | 0 | -0.473429 | 0.895050  | 3.261175  |
| 22 | 1 | 0 | -0.473430 | -0.895049 | 3.261175  |
| 23 | 1 | 0 | 1.076581  | -0.000000 | 3.239978  |

---

**Optimized cartesian coordinates for compound 16.**

| Center<br>Number | Atomic<br>Number | Atomic<br>Type | Coordinates (Angstroms) |           |           |
|------------------|------------------|----------------|-------------------------|-----------|-----------|
|                  |                  |                | X                       | Y         | Z         |
| 1                | 6                | 0              | 2.068108                | -0.278751 | -0.786494 |
| 2                | 6                | 0              | 1.370972                | -1.441735 | -0.858800 |
| 3                | 6                | 0              | -0.000000               | -1.615279 | -0.156929 |
| 4                | 6                | 0              | 1.342219                | 0.841599  | -0.165078 |
| 5                | 1                | 0              | 3.015291                | -0.157553 | -1.300836 |
| 6                | 1                | 0              | 1.776794                | -2.297213 | -1.389150 |
| 7                | 1                | 0              | -0.000000               | -2.556010 | 0.397582  |
| 8                | 6                | 0              | -1.370972               | -1.441735 | -0.858800 |
| 9                | 1                | 0              | -1.776794               | -2.297213 | -1.389150 |
| 10               | 6                | 0              | 0.744061                | 1.921304  | -0.740460 |
| 11               | 1                | 0              | 1.230503                | 2.509687  | -1.513565 |
| 12               | 6                | 0              | -0.744061               | 1.921304  | -0.740460 |
| 13               | 1                | 0              | -1.230503               | 2.509687  | -1.513565 |
| 14               | 6                | 0              | -2.068108               | -0.278750 | -0.786494 |
| 15               | 1                | 0              | -3.015291               | -0.157553 | -1.300836 |
| 16               | 6                | 0              | -1.342219               | 0.841599  | -0.165078 |
| 17               | 6                | 0              | 0.000000                | 0.030093  | 2.858662  |
| 18               | 1                | 0              | -0.897238               | -0.478964 | 3.209771  |
| 19               | 1                | 0              | 0.897238                | -0.478964 | 3.209771  |
| 20               | 1                | 0              | 0.000000                | 1.073507  | 3.173434  |
| 21               | 33               | 0              | 0.000000                | -0.004089 | 0.923610  |

---

**Optimized cartesian coordinates for compound 17.**

| Center<br>Number | Atomic<br>Number | Atomic<br>Type | Coordinates (Angstroms) |           |           |
|------------------|------------------|----------------|-------------------------|-----------|-----------|
|                  |                  |                | X                       | Y         | Z         |
| 1                | 6                | 0              | 0.348641                | 2.038968  | -0.716394 |
| 2                | 6                | 0              | 1.591961                | 1.321472  | -0.715409 |
| 3                | 6                | 0              | 1.597334                | 0.000001  | -0.182433 |
| 4                | 33               | 0              | -0.000764               | 0.000000  | 0.849204  |
| 5                | 6                | 0              | -0.798766               | 1.383329  | -0.183600 |
| 6                | 1                | 0              | 0.279132                | 2.928522  | -1.338069 |
| 7                | 1                | 0              | 2.397742                | 1.706136  | -1.336151 |
| 8                | 6                | 0              | 1.591962                | -1.321471 | -0.715409 |
| 9                | 1                | 0              | 2.397744                | -1.706134 | -1.336151 |
| 10               | 6                | 0              | -1.940386               | 0.717688  | -0.717144 |
| 11               | 1                | 0              | -2.676314               | 1.223167  | -1.337993 |
| 12               | 6                | 0              | -1.940385               | -0.717689 | -0.717144 |
| 13               | 1                | 0              | -2.676313               | -1.223169 | -1.337994 |
| 14               | 6                | 0              | 0.348643                | -2.038968 | -0.716394 |
| 15               | 1                | 0              | 0.279134                | -2.928521 | -1.338069 |
| 16               | 6                | 0              | -0.798765               | -1.383329 | -0.183599 |
| 17               | 6                | 0              | -0.000674               | 0.000000  | 2.785382  |
| 18               | 1                | 0              | 0.516264                | -0.895047 | 3.129126  |
| 19               | 1                | 0              | -1.034050               | -0.000000 | 3.129818  |
| 20               | 1                | 0              | 0.516264                | 0.895048  | 3.129126  |

**Optimized cartesian coordinates for compound S1.**

| Center<br>Number | Atomic<br>Number | Atomic<br>Type | Coordinates (Angstroms) |           |           |
|------------------|------------------|----------------|-------------------------|-----------|-----------|
|                  |                  |                | X                       | Y         | Z         |
| 1                | 6                | 0              | 0.305444                | 2.101894  | -0.417458 |
| 2                | 6                | 0              | 1.401894                | 1.318486  | -0.637910 |
| 3                | 6                | 0              | 1.257840                | 0.000000  | -0.143076 |
| 4                | 7                | 0              | -0.083442               | 0.000000  | 0.618810  |
| 5                | 6                | 0              | -0.813542               | 1.251701  | 0.140975  |
| 6                | 1                | 0              | 0.198847                | 3.156739  | -0.620141 |
| 7                | 1                | 0              | 2.304862                | 1.655711  | -1.132680 |
| 8                | 1                | 0              | -1.330098               | 1.703617  | 0.996171  |
| 9                | 6                | 0              | 1.401895                | -1.318486 | -0.637909 |
| 10               | 1                | 0              | 2.304863                | -1.655711 | -1.132679 |
| 11               | 6                | 0              | -1.813893               | 0.664025  | -0.839818 |
| 12               | 1                | 0              | -2.424900               | 1.305700  | -1.460840 |
| 13               | 6                | 0              | -1.813893               | -0.664025 | -0.839818 |
| 14               | 1                | 0              | -2.424900               | -1.305700 | -1.460840 |
| 15               | 6                | 0              | 0.305444                | -2.101894 | -0.417458 |
| 16               | 1                | 0              | 0.198847                | -3.156739 | -0.620141 |
| 17               | 6                | 0              | -0.813542               | -1.251701 | 0.140975  |

|    |   |   |           |           |          |
|----|---|---|-----------|-----------|----------|
| 18 | 1 | 0 | -1.330098 | -1.703618 | 0.996170 |
| 19 | 6 | 0 | 0.198289  | -0.000000 | 2.077679 |
| 20 | 1 | 0 | 0.779961  | -0.891476 | 2.307517 |
| 21 | 1 | 0 | 0.779961  | 0.891476  | 2.307517 |
| 22 | 1 | 0 | -0.742680 | -0.000000 | 2.634923 |

-----

**Optimized cartesian coordinates for compound S2.**

| Center<br>Number | Atomic<br>Number | Atomic<br>Type | Coordinates (Angstroms) |           |           |
|------------------|------------------|----------------|-------------------------|-----------|-----------|
|                  |                  |                | X                       | Y         | Z         |
| 1                | 6                | 0              | -0.342680               | -2.069995 | -0.737223 |
| 2                | 6                | 0              | -1.453797               | -1.294112 | -0.832583 |
| 3                | 6                | 0              | -1.464372               | 0.000000  | -0.139916 |
| 4                | 15               | 0              | 0.020877                | 0.000000  | 0.794012  |
| 5                | 6                | 0              | 0.852166                | -1.416286 | -0.021777 |
| 6                | 1                | 0              | -0.252032               | -3.067870 | -1.149538 |
| 7                | 1                | 0              | -2.305501               | -1.612543 | -1.429813 |
| 8                | 1                | 0              | 1.383389                | -2.098607 | 0.647523  |
| 9                | 6                | 0              | -1.453797               | 1.294111  | -0.832584 |
| 10               | 1                | 0              | -2.305500               | 1.612542  | -1.429814 |
| 11               | 6                | 0              | 1.805061                | -0.669051 | -0.956547 |
| 12               | 1                | 0              | 2.415851                | -1.246445 | -1.643237 |
| 13               | 6                | 0              | 1.805061                | 0.669051  | -0.956547 |
| 14               | 1                | 0              | 2.415851                | 1.246446  | -1.643236 |
| 15               | 6                | 0              | -0.342680               | 2.069996  | -0.737223 |
| 16               | 1                | 0              | -0.252032               | 3.067870  | -1.149537 |
| 17               | 6                | 0              | 0.852166                | 1.416287  | -0.021777 |
| 18               | 1                | 0              | 1.383389                | 2.098607  | 0.647523  |
| 19               | 6                | 0              | -0.046875               | 0.000000  | 2.615084  |
| 20               | 1                | 0              | -0.591501               | 0.887853  | 2.942196  |
| 21               | 1                | 0              | -0.591501               | -0.887853 | 2.942196  |
| 22               | 1                | 0              | 0.958525                | 0.000000  | 3.041947  |

-----

**Optimized cartesian coordinates for compound S3.**

| Center<br>Number | Atomic<br>Number | Atomic<br>Type | Coordinates (Angstroms) |           |           |
|------------------|------------------|----------------|-------------------------|-----------|-----------|
|                  |                  |                | X                       | Y         | Z         |
| 1                | 6                | 0              | -0.947319               | -0.326434 | -2.067934 |
| 2                | 6                | 0              | -1.052677               | -1.431424 | -1.280917 |
| 3                | 6                | 0              | -0.348447               | -1.505798 | 0.000002  |
| 4                | 33               | 0              | 0.735575                | 0.050559  | -0.000000 |
| 5                | 6                | 0              | -0.235678               | 0.892759  | -1.469179 |
| 6                | 1                | 0              | -1.381278               | -0.253313 | -3.059136 |
| 7                | 1                | 0              | -1.688869               | -2.258397 | -1.593171 |

|    |   |   |           |           |           |
|----|---|---|-----------|-----------|-----------|
| 8  | 1 | 0 | 0.375263  | 1.444139  | -2.186558 |
| 9  | 6 | 0 | -1.052677 | -1.431420 | 1.280921  |
| 10 | 1 | 0 | -1.688869 | -2.258393 | 1.593177  |
| 11 | 6 | 0 | -1.159475 | 1.809980  | -0.669394 |
| 12 | 1 | 0 | -1.870159 | 2.411746  | -1.228437 |
| 13 | 6 | 0 | -1.159475 | 1.809982  | 0.669389  |
| 14 | 1 | 0 | -1.870159 | 2.411750  | 1.228431  |
| 15 | 6 | 0 | -0.947319 | -0.326429 | 2.067935  |
| 16 | 1 | 0 | -1.381277 | -0.253305 | 3.059137  |
| 17 | 6 | 0 | -0.235677 | 0.892763  | 1.469176  |
| 18 | 1 | 0 | 0.375263  | 1.444145  | 2.186554  |
| 19 | 6 | 0 | 2.680553  | -0.102276 | 0.000000  |
| 20 | 1 | 0 | 2.969004  | -0.660948 | 0.890757  |
| 21 | 1 | 0 | 2.969004  | -0.660950 | -0.890755 |
| 22 | 1 | 0 | 3.141018  | 0.885273  | -0.000001 |

-----

**Optimized cartesian coordinates for compound 18.**

| Center<br>Number | Atomic<br>Number | Atomic<br>Type | Coordinates (Angstroms) |           |           |
|------------------|------------------|----------------|-------------------------|-----------|-----------|
|                  |                  |                | X                       | Y         | Z         |
| 1                | 6                | 0              | 0.372320                | 2.062369  | -0.555371 |
| 2                | 6                | 0              | 1.600317                | 1.353347  | -0.555609 |
| 3                | 6                | 0              | 1.464044                | 0.000001  | -0.270251 |
| 4                | 8                | 0              | 0.000096                | 0.000000  | 0.284183  |
| 5                | 6                | 0              | -0.731535               | 1.267391  | -0.271558 |
| 6                | 1                | 0              | 0.285880                | 3.094053  | -0.864775 |
| 7                | 1                | 0              | 2.536951                | 1.794409  | -0.865050 |
| 8                | 6                | 0              | 1.600318                | -1.353345 | -0.555608 |
| 9                | 1                | 0              | 2.536952                | -1.794407 | -0.865050 |
| 10               | 6                | 0              | -1.971955               | 0.709055  | -0.556160 |
| 11               | 1                | 0              | -2.822427               | 1.299832  | -0.864812 |
| 12               | 6                | 0              | -1.971955               | -0.709056 | -0.556160 |
| 13               | 1                | 0              | -2.822427               | -1.299834 | -0.864812 |
| 14               | 6                | 0              | 0.372321                | -2.062369 | -0.555371 |
| 15               | 1                | 0              | 0.285882                | -3.094053 | -0.864774 |
| 16               | 6                | 0              | -0.731534               | -1.267392 | -0.271558 |
| 17               | 6                | 0              | -0.000918               | 0.000000  | 1.826923  |
| 18               | 1                | 0              | 0.524602                | -0.910606 | 2.097399  |
| 19               | 1                | 0              | -1.052670               | 0.000000  | 2.095810  |
| 20               | 1                | 0              | 0.524601                | 0.910607  | 2.097399  |

-----

**Optimized cartesian coordinates for compound 19.**

| Center Number | Atomic Number | Atomic Type | Coordinates (Angstroms) |           |           |
|---------------|---------------|-------------|-------------------------|-----------|-----------|
|               |               |             | X                       | Y         | Z         |
| 1             | 6             | 0           | 0.368342                | 2.066147  | -0.663971 |
| 2             | 6             | 0           | 1.605615                | 1.352002  | -0.663359 |
| 3             | 6             | 0           | 1.558551                | 0.000001  | -0.218417 |
| 4             | 16            | 0           | -0.000198               | 0.000000  | 0.607990  |
| 5             | 6             | 0           | -0.779098               | 1.349510  | -0.219091 |
| 6             | 1             | 0           | 0.296133                | 3.033552  | -1.145995 |
| 7             | 1             | 0           | 2.479786                | 1.773156  | -1.144912 |
| 8             | 6             | 0           | 1.605616                | -1.352001 | -0.663360 |
| 9             | 1             | 0           | 2.479788                | -1.773154 | -1.144912 |
| 10            | 6             | 0           | -1.973526               | 0.714226  | -0.664327 |
| 11            | 1             | 0           | -2.775331               | 1.260702  | -1.145899 |
| 12            | 6             | 0           | -1.973526               | -0.714227 | -0.664327 |
| 13            | 1             | 0           | -2.775330               | -1.260704 | -1.145899 |
| 14            | 6             | 0           | 0.368343                | -2.066147 | -0.663971 |
| 15            | 1             | 0           | 0.296135                | -3.033552 | -1.145995 |
| 16            | 6             | 0           | -0.779097               | -1.349510 | -0.219091 |
| 17            | 6             | 0           | -0.000808               | 0.000000  | 2.410896  |
| 18            | 1             | 0           | 0.521764                | -0.905399 | 2.719934  |
| 19            | 1             | 0           | -1.046311               | 0.000000  | 2.719570  |
| 20            | 1             | 0           | 0.521764                | 0.905400  | 2.719934  |

**Optimized cartesian coordinates for Me<sub>4</sub>O<sup>2+</sup>.**

| Center Number | Atomic Number | Atomic Type | Coordinates (Angstroms) |           |           |
|---------------|---------------|-------------|-------------------------|-----------|-----------|
|               |               |             | X                       | Y         | Z         |
| 1             | 8             | 0           | 0.000000                | 0.000000  | 0.000000  |
| 2             | 6             | 0           | 0.928361                | 0.928361  | 0.928361  |
| 3             | 1             | 0           | 0.222146                | 1.513055  | 1.513055  |
| 4             | 1             | 0           | 1.513055                | 0.222146  | 1.513055  |
| 5             | 1             | 0           | 1.513055                | 1.513055  | 0.222146  |
| 6             | 6             | 0           | -0.928361               | -0.928361 | 0.928361  |
| 7             | 1             | 0           | -1.513055               | -0.222146 | 1.513055  |
| 8             | 1             | 0           | -1.513055               | -1.513055 | 0.222146  |
| 9             | 1             | 0           | -0.222146               | -1.513055 | 1.513055  |
| 10            | 6             | 0           | -0.928361               | 0.928361  | -0.928361 |
| 11            | 1             | 0           | -0.222146               | 1.513055  | -1.513055 |
| 12            | 1             | 0           | -1.513055               | 0.222146  | -1.513055 |
| 13            | 1             | 0           | -1.513055               | 1.513055  | -0.222146 |
| 14            | 6             | 0           | 0.928361                | -0.928361 | -0.928361 |
| 15            | 1             | 0           | 1.513055                | -0.222146 | -1.513055 |
| 16            | 1             | 0           | 1.513055                | -1.513055 | -0.222146 |
| 17            | 1             | 0           | 0.222146                | -1.513055 | -1.513055 |
